# Supplementary material
Source: PubMed Central journal article supplement (PMC5143421)
Supplement: cr2016135x1.pdf [file cr2016135x1.pdf]

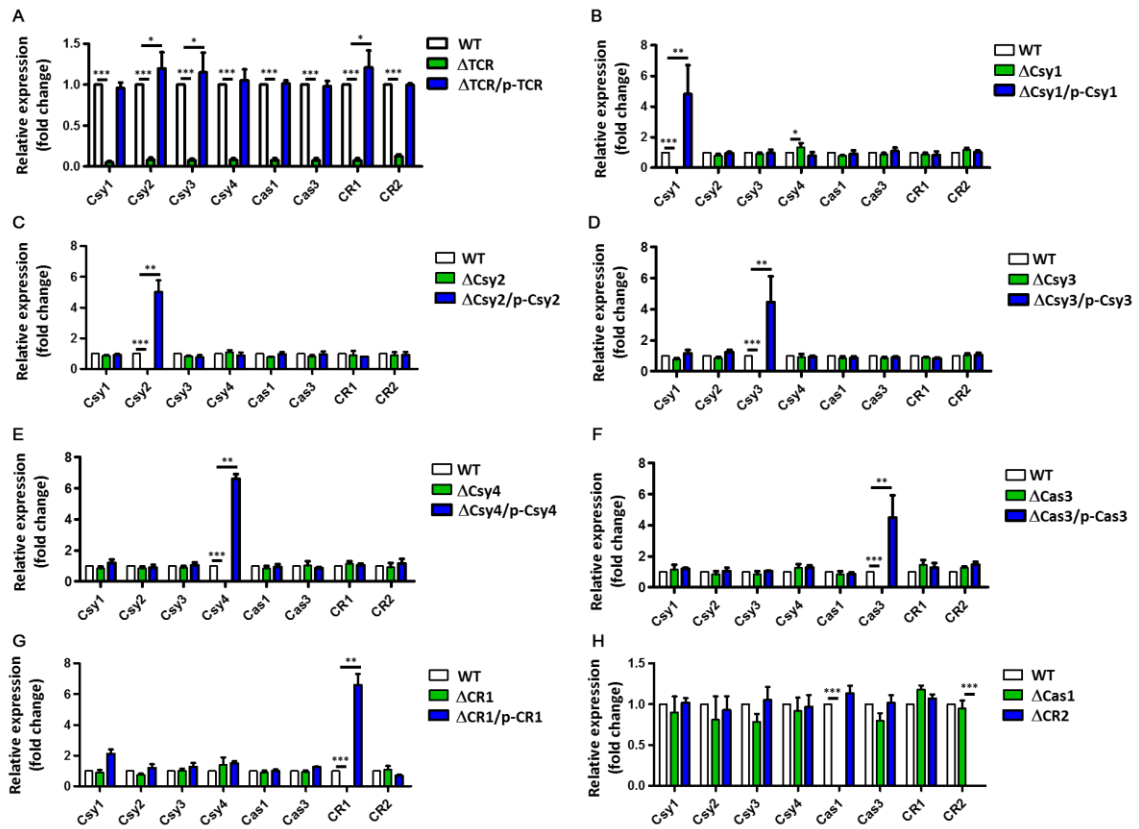

**Supplementary information, Figure S1** RNA was isolated when PA14 WT and total CRISPR-Cas cluster deletion mutant, single element deletion mutants and complementary strains grew at an  $OD_{600nm}$  of 1.0 in LB medium, and transcripts of indicated *cas* and *crispr* genes were quantified by qPCR. Data are representative of three independent experiments expressed as means  $\pm$  SEM (one-way ANOVA with Tukey's post hoc; \* $p \leq 0.05$ ; \*\* $p \leq 0.005$ ; \*\*\* $p \leq 0.001$ ).
