# Supplementary material
Source: PubMed Central journal article supplement (PMC5143421)
Supplement: cr2016135x2.pdf [file cr2016135x2.pdf]

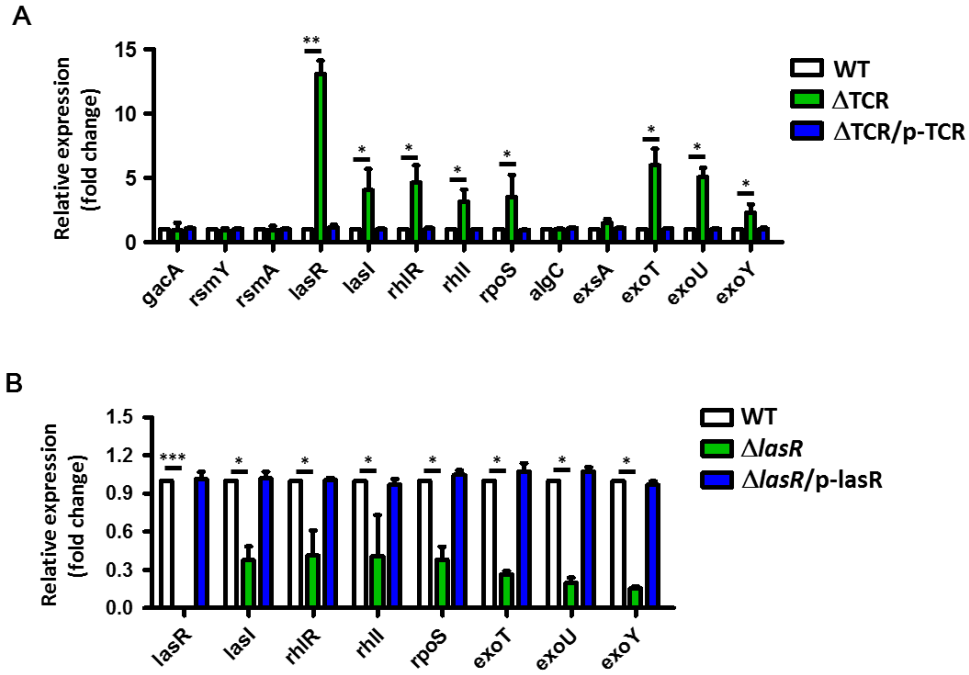

**Supplementary information, Figure S2** RNA was isolated when PA14 WT, ΔTCR, Δ*lasR* and their complementary strains grew at an OD<sub>600nm</sub> of 2.0 in M9 medium. Transcripts of indicated QS regulators and virulence factors in PA14 strains were quantified by qPCR. Data are representative of three independent experiments expressed as means ± SEM (one-way ANOVA with Tukey's post hoc; \* $p \leq 0.05$ ; \*\* $p \leq 0.005$ ).
