# Supplementary material
Source: PubMed Central journal article supplement (PMC5143421)
Supplement: cr2016135x3.pdf [file cr2016135x3.pdf]

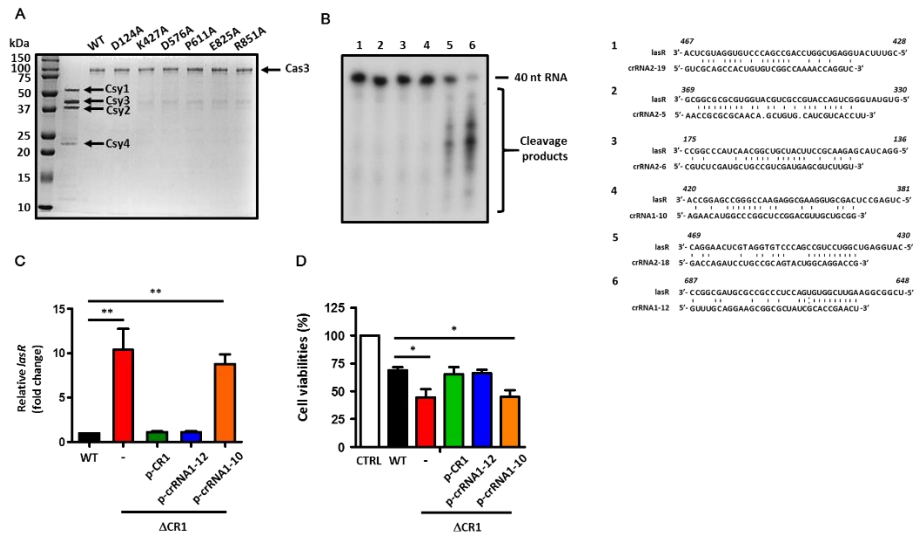

**Supplementary information, Figure S3 (A)** Coomassie-blue stained SDS-polyacrylamide gel of the affinity purified Csy complexes, WT Cas3 and its mutants. N-terminal His-tags on Csy3 were used as bait to pull down the other untagged Csy proteins. **(B)** Six *lasR* mRNA substrates that have high identity with PA14 CRISPR spacers were selected. *In vitro* cleavage assay of potential *lasR* targets. **(C)** RNA was isolated when PA14 WT,  $\Delta$ CR1 and its total or specific matured crRNA complemented mutant grew at an  $OD_{600nm}$  of 2.0 in M9 medium. Transcripts of *lasR* in PA14 WT and mutants were quantified by qPCR. **(D)** MH-S cells were infected with PA14 WT,  $\Delta$ CR1 and its total or specific crRNA complemented mutant at an MOI of 20:1 for 2 h. Cell viabilities were determined by an MTT assay at a wavelength of 570 nm. Data are representative of three independent experiments expressed as means  $\pm$  SEM (one-way ANOVA with Tukey's post hoc; \* $p \leq 0.05$ ; \*\* $p \leq 0.005$ ).
