# Supplementary material
Source: PubMed Central journal article supplement (PMC5143421)
Supplement: cr2016135x4.pdf [file cr2016135x4.pdf]

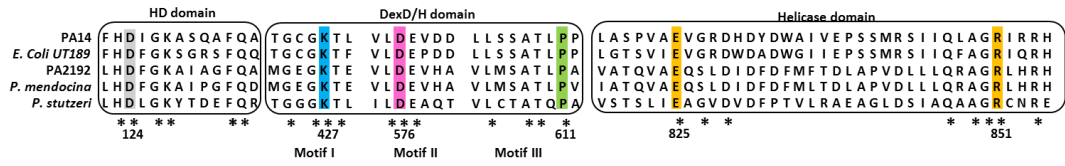

**Supplementary information, Figure S4** Homology comparison of Cas3 amino acid sequence in PA14, *E. coli* UT189, PA2192, *P. mendocina* and *P. stutzeri*. Conservation of Cas3 amino acid sequence around each domain/motif stars represents residues that are 100% conserved. Boxes were drawn around key residues chosen for mutational analysis.
