# Supplementary material
Source: PubMed Central journal article supplement (PMC5143421)
Supplement: cr2016135x5.pdf [file cr2016135x5.pdf]

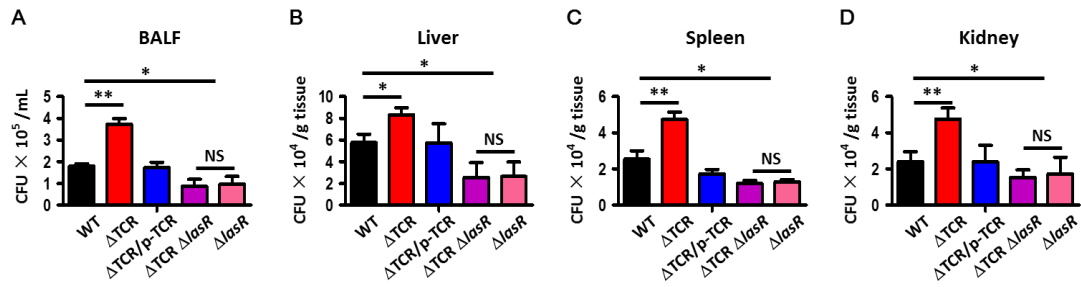

**Supplementary information, Figure S5** Mice infected with  $5 \times 10^6$  CFU/mouse with PA14 WT,  $\Delta$ TCR and its complementary strain, single  $\Delta$ lasR mutant and  $\Delta$ TCR $\Delta$ lasR double deletion mutant, respectively. After 24 h infection, bacterial burdens in BAL fluid (A), liver (B), spleen (C) and kidney (D) from mice infected with indicated strains were quantified by CFU assay. Data are representative of three independent experiments expressed as means  $\pm$  SEM (n=3, one-way ANOVA with Tukey's post hoc; \* $p \leq 0.05$ ; \*\* $p \leq 0.005$ ).
