# Supplementary material
Source: PubMed Central journal article supplement (PMC5143421)
Supplement: cr2016135x6.pdf [file cr2016135x6.pdf]

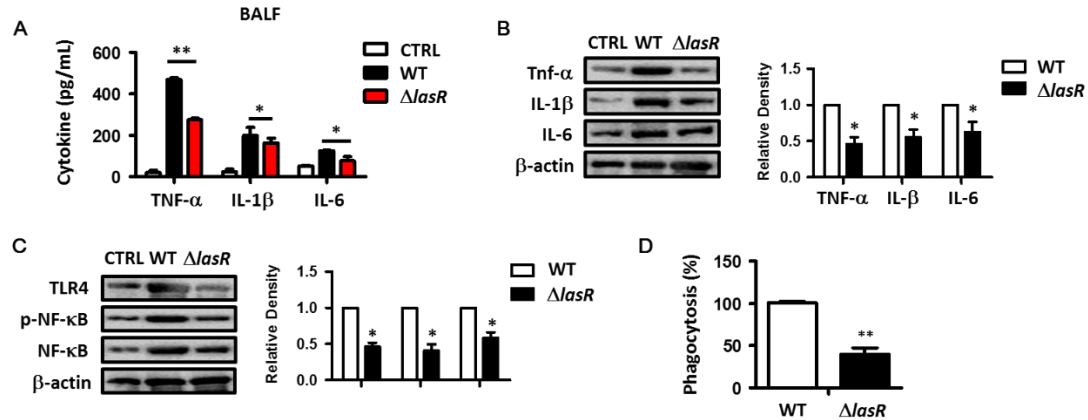

**Supplementary information, Figure S6** Depletion of LasR alters TLR4-related host defense in mice and macrophages. Mice infected with  $5 \times 10^6$  CFU/mouse with PA14 WT and  $\Delta lasR$  mutant, respectively. **(A)** After 24 h infection, inflammatory cytokines in mouse BAL fluid were assessed by ELISA. **(B)** Expression of inflammatory cytokines in MH-S cells was detected by immunoblotting. **(C)** Expression of TLR4, NF- $\kappa$ B and p-NF- $\kappa$ B in PA14 WT-, and  $\Delta lasR$  mutant-infected mouse lungs were detected by immunoblotting. **(D)** Phagocytosis of MH-S cells infected with PA14 WT and  $\Delta lasR$  mutant measured by CFU count assay. These data are present of three independent experiments and are shown as means  $\pm$  SEM (n=3, one-way ANOVA with Tukey's post hoc; \* $p \leq 0.05$ ; \*\* $p \leq 0.005$ ).
