# Supplementary material
Source: PubMed Central journal article supplement (PMC5143421)
Supplement: cr2016135x7.pdf [file cr2016135x7.pdf]

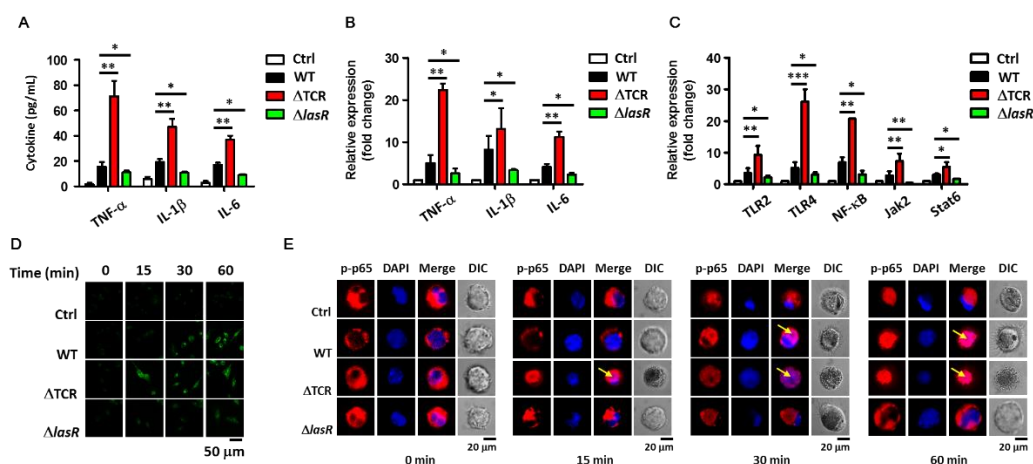

**Supplementary information, Figure S7** Data of human AMs collaborate murine macrophage results. Human AMs were isolated from human BALF and then infected with PA14 WT,  $\Delta$ TCR mutant and  $\Delta$ lasR mutant at an MOI of 20:1 for 2 h. Secretion of TNF- $\alpha$ , IL-1 $\beta$  and IL-6 in the medium was determined by ELISA (**A**) and transcripts of TNF- $\alpha$ , IL-1 $\beta$ , IL-6, TLR2, TLR4, NF- $\kappa$ B, Jak2 and Stat6 in human AMs were determined by qPCR after bacterial infection (**B-C**). (**D**) Human AMs were isolated from human BALF and then infected with PA14 WT,  $\Delta$ TCR mutant and  $\Delta$ lasR mutant at an MOI of 20:1 for 0, 15, 30 and 60 min. CLSM showed the production of TLR4 in human AMs using immunostaining. (**E**) CLSM showed the translocation of p-NF- $\kappa$ B (p-p65) in MH-S cells using immunostaining. DAPI was used to stain the nucleus (arrows showing the nuclear translocation). Data are representative of three independent experiments expressed as means  $\pm$  SEM (n=3, one-way ANOVA with Tukey's post hoc; \* $p \leq 0.05$ ; \*\* $p \leq 0.005$ ).
