# Supplementary material
Source: PubMed Central journal article supplement (PMC5143421)
Supplement: cr2016135x8.pdf [file cr2016135x8.pdf]

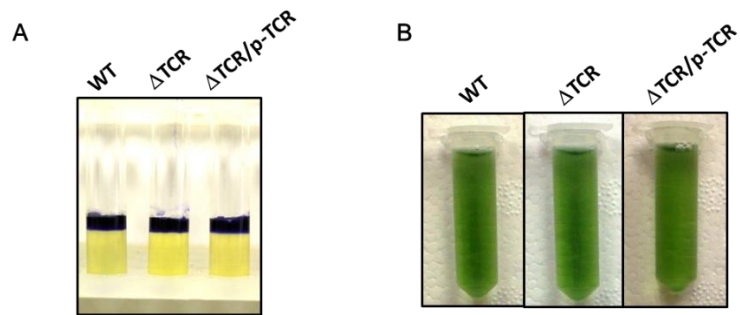

**Supplementary information, Figure S8 (A)** PA14 WT,  $\Delta$ TCR and its complementary strains were cultured in LB medium for 24 h shaking at 220 rpm, and then static grew in tubes for 72 h. Biofilm were stained by 1 mg/mL crystal violet. **(B)** PA14 WT,  $\Delta$ TCR and its complementary strains were cultured in LB medium for 72 h, keep shaking at 220 rpm.
