# Supplementary material
Source: PubMed Central journal article supplement (PMC5143421)
Supplement: cr2016135x9.pdf [file cr2016135x9.pdf]

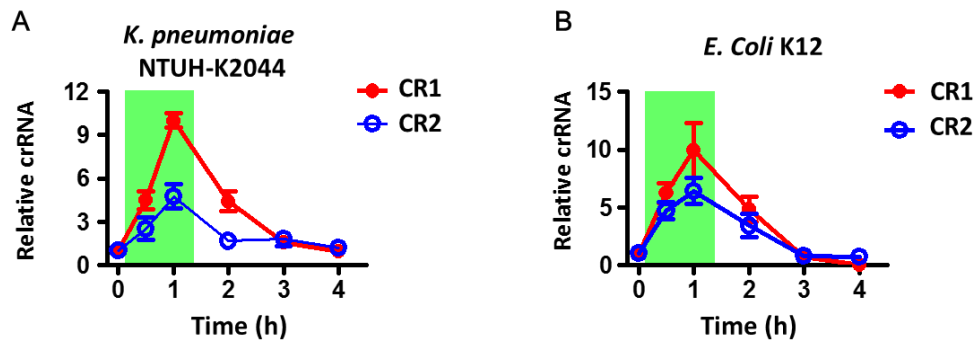

**Supplementary information, Figure S9** MH-S cells were infected with *K.*

*pneumoniae* NTUH-2044 and *E. coli* K12 respectively at an MOI of 20:1. CRISPR

transcripts of MH-S phagocytized *K. pneumoniae* (**A**) and *E. coli* (**B**), were quantified

at the indicated time points by qPCR. Data are representative of three independent

experiments expressed as means  $\pm$  SEM (n=3).
