# Supplementary material
Source: PubMed Central journal article supplement (PMC5143421)
Supplement: cr2016135x10.pdf [file cr2016135x10.pdf]

**Supplementary information, Table S1** Relative normalized expression of host innate and adaptive immune response factors.

| Gene name | Gene description                                     | PA14 normalized expression | $\Delta$ TCR normalized expression | Fold change     |
|-----------|------------------------------------------------------|----------------------------|------------------------------------|-----------------|
| B2m       | Beta-2 microglobulin                                 | 12.9247                    | 14.64174                           | 1.13285         |
| C3        | Complement component 3                               | 4.41391                    | 3.0026                             | -1.47423        |
| C5ar1     | Complement component 5a receptor 1                   | 0.03866                    | 0.08186                            | 2.11759         |
| Casp1     | Caspase 1                                            | 2.55417                    | 6.08135                            | 2.38095         |
| Ccl12     | Chemokine (C-C motif) ligand 12                      | 1.51815                    | 3.68184                            | 2.42522         |
| Ccl5      | Chemokine (C-C motif) ligand 5                       | 21.93481                   | 49.46979                           | 2.25531         |
| Ccr5      | Chemokine (C-C motif) receptor 5                     | 0.00733                    | 0.03952                            | 5.39183         |
| Ccr6*     | Chemokine (C-C motif) receptor 6                     | 0.0067                     | 0.08323                            | <b>12.42385</b> |
| Ccr8      | Chemokine (C-C motif) receptor 8                     | 0.00002                    | 0.00005                            | 2.44667         |
| Cd14      | CD14 antigen                                         | 6.7808                     | 28.8584                            | 4.2559          |
| Cd4       | CD4 antigen                                          | 0.00142                    | 0.00447                            | 3.15007         |
| Cd40      | CD40 antigen                                         | 0.43505                    | 0.77095                            | 1.77211         |
| Cd80      | CD80 antigen                                         | 0.02757                    | 0.02676                            | -1.03275        |
| Cd86      | CD86 antigen                                         | 0.10694                    | 0.12114                            | 1.13285         |
| Cd8a      | CD8 antigen, alpha chain                             | 0.00241                    | 0.00715                            | 2.96913         |
| Crp       | C-reactive protein, pentraxin-related                | 0.00201                    | 0.00066                            | -3.05198        |
| Csf2      | Colony stimulating factor 2 (granulocyte-macrophage) | 1.5051                     | 1.01695                            | -1.48788        |
| Cxcl10    | Chemokine (C-X-C motif) ligand 10                    | 11.38436                   | 25.90454                           | 2.27545         |
| Cxcr3     | Chemokine (C-X-C motif) receptor 3                   | 0.00056                    | 0.00143                            | 2.55624         |
| Ddx58     | DEAD (Asp-Glu-Ala-Asp) box polypeptide 58            | 0.11109                    | 0.27422                            | 2.46852         |
| Fasl      | Fas ligand (TNF superfamily, member 6)               | 0.00005                    | 0.00014                            | 2.86103         |
| Foxp3     | Forkhead box P3                                      | 0.00006                    | 0.00004                            | -1.49346        |
| Gata3     | GATA binding protein 3                               | 0.00105                    | 0.0029                             | 2.76228         |
| gDNA      | PrimePCR DNA Contamination Control Assay             | 0.00064                    | 0.00063                            | -1.0599         |
| Gusb      | Glucuronidase, beta                                  | 0.59684                    | 1.2067                             | 2.02182         |
| H2-Q10    | Histocompatibility 2, Q region locus 10              | 0.00127                    | 2.31329                            | -5.49083        |
| H2-T23    | Histocompatibility 2, T region locus 23              | 1.74415                    | 1.73777                            | -1.00208        |
| Hprt      | Hypoxanthine guanine phosphoribosyl transferase      | 0.59688                    | 0.34579                            | -1.72612        |
| Hsp90ab1  | Heat shock protein 90 alpha                          | 1.91758                    | 1.92128                            | 1.00193         |

|        |                                                                                     |         |          |                  |
|--------|-------------------------------------------------------------------------------------|---------|----------|------------------|
|        | (cytosolic), class B member 1                                                       |         |          |                  |
| Icam1  | Intercellular adhesion molecule 1                                                   | 0.38322 | 0.90671  | 2.36603          |
| Ifna2  | Interferon alpha 2                                                                  | 0.01221 | 0.04090  | 3.35033          |
| Ifnar1 | Interferon (alpha and beta) receptor 1                                              | 0.05355 | 0.17437  | 3.25625          |
| Ifnb1  | Interferon beta 1, fibroblast                                                       | 0.08159 | 0.28743  | 3.52294          |
| Ifngr1 | Interferon gamma receptor 1                                                         | 0.02986 | 0.05105  | 1.70992          |
| Il10   | Interleukin 10                                                                      | 0.01623 | 0.05323  | 3.27987          |
| Il13*  | Interleukin 13                                                                      | 0.00067 | 0.00006  | <b>-10.74741</b> |
| Il17a  | Interleukin 17A                                                                     | 0.00149 | 0.00352  | 2.366            |
| Il18   | Interleukin 18                                                                      | 0.2355  | 0.87271  | 3.70578          |
| Il1a   | Interleukin 1 alpha                                                                 | 0.26022 | 1.12811  | 4.33525          |
| Il1b   | Interleukin 1 beta                                                                  | 8.54267 | 17.38928 | 2.03558          |
| Il1r1  | Interleukin 1 receptor, type I                                                      | 0.00016 | 0.00047  | 2.96411          |
| Il2    | Interleukin 2                                                                       | 0.0001  | 0.00034  | 3.48384          |
| Il23a  | Interleukin 23, alpha subunit p19                                                   | 0.00194 | 0.00442  | 2.28245          |
| Il4    | Interleukin 4                                                                       | 0.00024 | 0.00136  | 5.69698          |
| Il5    | Interleukin 5                                                                       | 0.00089 | 0.00191  | 2.14824          |
| Il6    | Interleukin 6                                                                       | 2.54786 | 11.24859 | 4.41492          |
| Irak1  | Interleukin-1 receptor-associated kinase 1                                          | 0.03316 | 0.07850  | 2.36758          |
| Irf3   | Interferon regulatory factor 3                                                      | 0.10736 | 0.34182  | 3.18393          |
| Irf7   | Interferon regulatory factor 7                                                      | 3.65805 | 10.62323 | 2.90407          |
| Itgam  | Integrin alpha M                                                                    | 0.01316 | 0.03915  | 2.9753           |
| Jak2*  | Janus kinase 2                                                                      | 0.0138  | 0.81197  | <b>58.83885</b>  |
| Ly96   | Lymphocyte antigen 96                                                               | 0.16317 | 0.16371  | 1.00331          |
| Lyz2   | Lysozyme 2                                                                          | 0.45406 | 1.04624  | 2.30421          |
| Mapk1  | Mitogen-activated protein kinase 1                                                  | 0.04801 | 0.11505  | 2.39653          |
| Mapk8  | Mitogen-activated protein kinase 8                                                  | 0.00823 | 0.01828  | 2.22144          |
| Mpo    | Myeloperoxidase                                                                     | 0.00047 | 0.00013  | -3.60394         |
| Mx1    | Myxovirus (influenza virus) resistance 1                                            | 0.0254  | 0.02725  | 1.07303          |
| Myd88  | Myeloid differentiation primary response gene 88                                    | 0.36401 | 0.99275  | 2.72727          |
| Nfkb1* | Nuclear factor of kappa light polypeptide gene enhancer in B cells 1, p105          | 0.18226 | 5.53932  | <b>30.39241</b>  |
| Nfkbia | Nuclear factor of kappa light polypeptide gene enhancer in B cells inhibitor, alpha | 5.41358 | 15.47022 | 2.85767          |
| Nlrp3  | NLR family, pyrin domain containing 3                                               | 0.34143 | 0.45407  | 1.32992          |
| Nod1   | Nucleotide-binding oligomerization domain containing 1                              | 0.00058 | 0.00075  | 1.29567          |

|         |                                                                                     |         |             |                  |
|---------|-------------------------------------------------------------------------------------|---------|-------------|------------------|
| Nod2    | Nucleotide-binding oligomerization domain containing 2                              | 0.01059 | 5.36824     | 1.35278          |
| PCR     | PrimePCR Positive Control Assay                                                     | 0.00495 | 0.00458     | -1.08326         |
| Rorc    | RAR-related orphan receptor gamma                                                   | 0.00183 | 0.00165     | -1.10576         |
| RQ1     | PrimePCR RNA Quality Assay                                                          | 0.06708 | 0.05782     | -1.15666         |
| RQ2     | PrimePCR RNA Quality Assay                                                          | 0.09958 | 6.08135     | 1.18103          |
| RT      | PrimePCR Reverse Transcription Control Assay                                        | 0.00039 | 0.00034     | -1.15887         |
| Slc11a1 | Solute carrier family 11 (proton-coupled divalent metal ion transporters), member 1 | 0.47396 | 0.81521     | 1.72416          |
| Stat1   | Signal transducer and activator of transcription 1                                  | 0.33299 | 0.5182      | 1.54341          |
| Stat3   | Signal transducer and activator of transcription 3                                  | 0.09792 | 0.63119     | 6.44603          |
| Stat4*  | Signal transducer and activator of transcription 4                                  | 0.0011  | 0.00001     | <b>-82.36879</b> |
| Stat6*  | Signal transducer and activator of transcription 6                                  | 0.05736 | 1.60493     | <b>27.98355</b>  |
| Tbx21*  | T-box 21                                                                            | 0.00062 | 0.00006     | <b>-10.67382</b> |
| Ticam1  | Toll-like receptor adaptor molecule 1                                               | 0.03267 | 0.0637      | 1.95331          |
| Tlr1    | Toll-like receptor 1                                                                | 0.0021  | 0.0529      | 2.52363          |
| Tlr2*   | Toll-like receptor 2                                                                | 0.59478 | 27.55496    | <b>46.32815</b>  |
| Tlr3    | Toll-like receptor 3                                                                | 0.06133 | 0.12494     | <b>2.04432</b>   |
| Tlr4*   | Toll-like receptor 4                                                                | 0.01093 | 2.08041     | <b>190.34834</b> |
| Tlr5    | Toll-like receptor 5                                                                | 0.00219 | 0.00475     | 2.17239          |
| Tlr6*   | Toll-like receptor 6                                                                | 0.00094 | 0.01241     | <b>13.2062</b>   |
| Tlr7    | Toll-like receptor 7                                                                | 0.03448 | 0.07171     | 2.0804           |
| Tlr8    | Toll-like receptor 8                                                                | 0.00137 | 0.00719     | 5.25334          |
| Tlr9    | Toll-like receptor 9                                                                | 0.00661 | 0.0059      | -1.12293         |
| Tnfa*   | Tumor necrosis factor                                                               | 6.38095 | 103.754     | <b>16.26421</b>  |
| Traf6   | TNF receptor-associated factor 6                                                    | 0.00273 | 0.0097      | 3.55547          |
| Tyk2    | Tyrosine kinase 2                                                                   | 0.04414 | -           | 0.07048          |
|         |                                                                                     |         | 0.000678336 |                  |

\* Higher than 10-fold change
