# Supplementary material
Source: PubMed Central journal article supplement (PMC5143421)
Supplement: cr2016135x11.pdf [file cr2016135x11.pdf]

**Supplementary information, Table S2** CRISPR-Cas and QS systems in the pathogen species<sup>1,#</sup>

| Species                                                     | CRISPR-Cas system presence |         |          | QS system presence |
|-------------------------------------------------------------|----------------------------|---------|----------|--------------------|
|                                                             | Type I                     | Type II | Type III |                    |
| <i>Campylobacter concisus/curvus/fetus/homonis/rectus</i> * | +                          |         |          | +                  |
| <i>Campylobacter jejuni</i> *                               | +                          | +       |          | +                  |
| <i>Corynebacterium diphtheriae</i>                          | +                          | +       |          |                    |
| <i>Desulfovibrio vulgaris</i>                               | +                          |         |          |                    |
| <i>Enterococcus faecalis/faecium</i> *                      |                            | +       |          | +                  |
| <i>Erwinia amylovora</i> *                                  | +                          |         |          | +                  |
| <i>Erwinia pyrifoliae</i> *                                 | +                          |         |          | +                  |
| <i>Erwinia tasmaniensis</i> *                               | +                          |         |          | +                  |
| <i>Escherichia albertii/coli</i> *                          | +                          |         |          | +                  |
| <i>Francisella novicida/tularensis</i> *                    |                            | +       |          | +                  |
| <i>Lactobacillus rhamnosus</i> *                            |                            | +       |          | +                  |
| <i>Lactobacillus salivarius</i>                             |                            | +       | +        |                    |
| <i>Legionella pneumophila</i> *                             |                            | +       |          | +                  |
| <i>Listeria monocytogenes</i> *                             | +                          | +       |          | +                  |
| <i>Mycobacterium tuberculosis</i>                           |                            |         | +        |                    |
| <i>Mycoplasma gallisepticum</i>                             |                            | +       |          |                    |
| <i>Myxococcus xanthus</i>                                   | +                          |         | +        |                    |
| <i>Neisseria cinerea</i>                                    |                            | +       | +        |                    |
| <i>Neisseria gonorrhoeae</i>                                | +                          |         |          |                    |
| <i>Neisseria lactamica</i>                                  | +                          | +       |          |                    |
| <i>Neisseria meningitidis</i>                               |                            | +       |          |                    |
| <i>Neisseria mucosa</i>                                     | +                          |         | +        |                    |
| <i>Pasteurella multocida</i>                                | +                          | +       |          |                    |
| <i>Propionibacterium acnes (type II)</i>                    | +                          |         |          |                    |
| <i>Pseudomonas aeruginosa</i> *                             | +                          |         |          | +                  |
| <i>Salmonella enterica</i> *                                | +                          |         |          | +                  |
| <i>Shigella dysenteriae</i> *                               | +                          |         |          | +                  |
| <i>Streptococcus agalactiae/dysgalactiae/equi</i>           | +                          | +       | +        |                    |
| <i>Streptococcus gallolyticus</i>                           |                            | +       | +        |                    |
| <i>Streptococcus gordonii</i> *                             |                            | +       | +        | +                  |
| <i>Streptococcus mutans</i> *                               | +                          | +       | +        | +                  |
| <i>Streptococcus pyogenes</i> *                             | +                          | +       | +        | +                  |
| <i>Streptococcus sanguis</i> *                              | +                          | +       | +        | +                  |
| <i>Streptococcus thermophilus</i> *                         |                            | +       | +        | +                  |
| <i>Sulfolobus solfataricus</i> *                            | +                          |         | +        | +                  |
| <i>Treponema brennaborensis/saccharophilum</i>              | +                          |         |          |                    |
| <i>Treponema denticola</i>                                  |                            | +       |          |                    |
| <i>Treponema succinifaciens</i>                             |                            |         | +        |                    |
| <i>Yersinia pestis</i> *                                    |                            | +       |          | +                  |

# This table is derived from Louwen et al.'s work<sup>1</sup> with modifications, \* Pathogen species have both

CRISPR and quorum sensing systems.

## **References**

1 Louwen R, Staals RH, Endtz HP, van Baarlen P, van der Oost J. The role of CRISPR-Cas systems in virulence of pathogenic bacteria. *Microbiology and molecular biology reviews : MMBR* 2014; **78**:74-88.
