# Supplementary material
Source: PubMed Central journal article supplement (PMC5143421)
Supplement: cr2016135x12.pdf [file cr2016135x12.pdf]

**Supplementary information, Table S3** Strains, plasmids and primers used in this study

| Strain, plasmid or primers    | Relevant phenotype or description                                                                                | Source or reference |
|-------------------------------|------------------------------------------------------------------------------------------------------------------|---------------------|
| <i>Strains</i>                |                                                                                                                  |                     |
| PA14                          | Wild type                                                                                                        | Our lab             |
| ΔTCR                          | PA14, total <i>crispr</i> and <i>cas</i> region deleting                                                         | 2                   |
| Δ <i>csy1</i>                 | PA14, <i>csy1</i> deleting                                                                                       | 2                   |
| Δ <i>cas1</i>                 | PA14, <i>cas1</i> deleting                                                                                       | 2                   |
| Δ <i>csy2</i>                 | PA14, <i>csy2</i> deleting                                                                                       | 2                   |
| Δ <i>csy3</i>                 | PA14, <i>csy3</i> deleting                                                                                       | 2                   |
| Δ <i>cas3</i>                 | PA14, <i>cas3</i> deleting                                                                                       | 2                   |
| Δ <i>csy4</i>                 | PA14, <i>csy4</i> deleting                                                                                       | 2                   |
| ΔCR1                          | PA14, <i>crispr</i> region 1 deleting                                                                            | 2                   |
| ΔCR2                          | PA14, <i>crispr</i> region 2 deleting                                                                            | 2                   |
| Δ <i>lasR</i>                 | PA14, <i>lasR</i> deleting                                                                                       | 3                   |
| ΔTCR Δ <i>lasR</i>            | PA14, <i>lasR</i> and total <i>crispr</i> and <i>cas</i> region double deleting                                  | This study          |
| ΔTCR/p-TCR                    | ΔTCR, pAK1900-TCR                                                                                                | This study          |
| Δ <i>lasR</i> /p- <i>lasR</i> | Δ <i>lasR</i> , pAK1900- <i>lasR</i>                                                                             | This study          |
| Δ <i>csy1</i> /p- <i>csy1</i> | PA14, <i>csy1</i> deleting, pMQ70- <i>csy1</i>                                                                   | 2                   |
| Δ <i>csy2</i> /p- <i>csy2</i> | PA14, <i>csy2</i> deleting, pMQ70- <i>csy2</i>                                                                   | 2                   |
| Δ <i>csy3</i> /p- <i>csy3</i> | PA14, <i>csy3</i> deleting, pMQ70- <i>csy3</i>                                                                   | 2                   |
| Δ <i>csy4</i> /p- <i>csy4</i> | PA14, <i>csy4</i> deleting, pMQ70- <i>csy4</i>                                                                   | 2                   |
| Δ <i>cas3</i> /p- <i>cas3</i> | PA14, <i>cas3</i> deleting, pMQ70- <i>cas3</i> His                                                               | 2                   |
| Δ <i>cas3</i> /p- D124A       | PA14, <i>cas3</i> deleting, pMQ70- <i>cas3</i> (D124A)His                                                        | This study          |
| Δ <i>cas3</i> /p-K427         | PA14, <i>cas3</i> deleting, pMQ70- <i>cas3</i> (K427A)His                                                        | This study          |
| Δ <i>cas3</i> /p-D576A        | PA14, <i>cas3</i> deleting, pMQ70- <i>cas3</i> (D576A)His                                                        | This study          |
| Δ <i>cas3</i> /p-P611A        | PA14, <i>cas3</i> deleting, pMQ70- <i>cas3</i> (P611A)His                                                        | This study          |
| Δ <i>cas3</i> /p-E825A        | PA14, <i>cas3</i> deleting, pMQ70- <i>cas3</i> (E825A)His                                                        | This study          |
| Δ <i>cas3</i> /p-R852A        | PA14, <i>cas3</i> deleting, pMQ70- <i>cas3</i> (R852A)His                                                        | This study          |
| ΔCR1/p-CR1                    | PA14, <i>crispr</i> region 1 deleting, pgRNA-CR1                                                                 | This study          |
| ΔCR1/p-crRNA1-12              | PA14, <i>crispr1</i> deleting, pgRNA-crRNA1-12                                                                   | This study          |
| PA14-EGFP                     | PA14, pMQ70- <i>egfp</i>                                                                                         | This study          |
| ΔTCR-EGFP                     | ΔTCR, pMQ70- <i>egfp</i>                                                                                         | This study          |
| Δ <i>lasR</i> -EGFP           | Δ <i>lasR</i> , pMQ70- <i>egfp</i>                                                                               | This study          |
| PAO1                          | Wild type                                                                                                        | Our lab             |
| KP NTUH-2044                  | Wild type                                                                                                        | 4                   |
| <i>E. coli</i> BL21 pCsy1-4   | BL21, pHMGWA-Csy1-4                                                                                              | 5                   |
| <i>E. coli</i> K12            | Wild type                                                                                                        | Our lab             |
| <i>Plasmids</i>               |                                                                                                                  |                     |
| pMQ70                         | Arabinose-inducible expression vector; Cb <sup>r</sup> Ap <sup>r</sup>                                           | 6                   |
| pMQ70- <i>cas3</i> His        | PA14- <i>cas3</i> complementation construct; Cb <sup>r</sup> Ap <sup>r</sup>                                     | This study          |
| pMQ70- <i>cas3</i> (D124A)His | PA14- <i>cas3</i> complementation construct with catalytic residue D124A mutant; Cb <sup>r</sup> Ap <sup>r</sup> | This study          |
| pMQ70- <i>cas3</i> (K427A)His | PA14- <i>cas3</i> complementation construct with catalytic residue K427A mutant; Cb <sup>r</sup> Ap <sup>r</sup> | This study          |

|                               |                                                                                                                  |            |
|-------------------------------|------------------------------------------------------------------------------------------------------------------|------------|
| pMQ70- <i>cas3</i> (D576A)His | PA14_ <i>cas3</i> complementation construct with catalytic residue D576A mutant; Cb <sup>r</sup> Ap <sup>r</sup> | This study |
| pMQ70- <i>cas3</i> (P611A)His | PA14_ <i>cas3</i> complementation construct with catalytic residue P611A mutant; Cb <sup>r</sup> Ap <sup>r</sup> | This study |
| pMQ70- <i>cas3</i> (E825A)His | PA14_ <i>cas3</i> complementation construct with catalytic residue E825A mutant; Cb <sup>r</sup> Ap <sup>r</sup> | This study |
| pMQ70- <i>cas3</i> (R852A)His | PA14_ <i>cas3</i> complementation construct with catalytic residue R852A mutant; Cb <sup>r</sup> Ap <sup>r</sup> | This study |
| pMQ70- <i>egfp</i>            | Enhanced green fluorescent protein construct; Cb <sup>r</sup> Ap <sup>r</sup>                                    | This study |
| pgRNA                         | Bacterial guide RNA expression vector                                                                            | Our lab    |
| pgRNA-CR1                     | PA14_CR1 complementation construct                                                                               | This study |
| pgRNA-crRNA1-12               | PA14_crRNA1-12 complementation construct                                                                         | This study |
| pAK1900                       | <i>P. aeruginosa</i> expression vector; Ap <sup>r</sup>                                                          | Our lab    |
| plasR                         | pAK1900-lasR; Ap <sup>r</sup>                                                                                    | This study |
| pTCR                          | pAK1900-TCR; Ap <sup>r</sup>                                                                                     | This study |
| pCVD442                       | <i>P. aeruginosa</i> gene knockout vector; Ap <sup>r</sup>                                                       | Our lab    |
| pKO-lasR                      | pCVD442-lasR-flank                                                                                               | This study |

---

Primers for qRT-PCR

|        |                        |
|--------|------------------------|
| Csy1 F | CCGCAGAACATCAGTCAGTT   |
| Csy1 R | ATGCTCGAAGACCGAAGAGT   |
| Cas1 F | GACATTTCTCCCAGCGAACT   |
| Cas1 R | TGTTCCAGTAGTGCGAATGC   |
| Csy2 F | AGTCGGAATCTCCCTCGATA   |
| Csy2 R | TCAGGTTGAAGACCTTGGTG   |
| Csy3 F | ATGTCCTGCTCGAAGTGGT    |
| Csy3 R | CTTGCTCTTCTGGCCTTCT    |
| Cas3 F | CGACAACCTCGATGAACTGCT  |
| Cas3 R | GCGAGTACGACGAACAGATG   |
| Csy4 F | CCGTACCGTCAGGTCAGTC    |
| Csy4 R | GAGCCTCCTCCTCACTCAGA   |
| CR1 F  | TGCCGTATAGGCAGCTAAGA   |
| CR1 R  | ACGACCTATGTGGCAGTGAA   |
| CR2 F  | TGAACTTATCAAGCGGCTGT   |
| CR2 R  | CTCGAGCACGATTGTTCACT   |
| 16S F  | TGGTTTAATTCGAAGCAACG   |
| 16S R  | ATCTCACGACACGAGCTGAC   |
| gacA F | CCGACTGCGGTGAAGACTGT   |
| gacA R | GGTGACTACCACGACCTTGATG |
| rsmY F | GCCAAAGACAATACGGAAAC   |
| rsmY R | TCTATCCTGACATCCGTGCT   |
| rsmA F | TACTGGGTGTCAAAGGGAAC   |
| rsmA R | ATGGTTTGGCTCTTGATCTT   |
| lasR F | CTTCATCGTCGGCAACTAC    |
| lasR F | GTCTGGTAGATGGACGGTTC   |

|            |                         |
|------------|-------------------------|
| lasI F     | TGCGTGCTCAAGTGTTCAAGG   |
| lasI R     | TGTCCAGAGTTGATGGCGAAA   |
| rhIR F     | GCTCCTCGGAAATGGTGGT     |
| rhIR R     | GGAAAGCACGCTGAGCAAAT    |
| rhII F     | TCCGCAAACCCGCTACATC     |
| rhII R     | TCTCGCCCTTGACCTTCTGC    |
| rpoS F     | GCCTGAACGAACGGGTGACT    |
| rpoS R     | CACCTCACGCTGCTTGTCG     |
| algC F     | GGAGAACCTGAAGGACCTGA    |
| algC R     | AAGCCGAGAACGCCGACCT     |
| exsA F     | GGTAAACAAGGAAGAGGGCGTAT |
| exsA R     | GGACGAAGCCTTG TAGAACTGG |
| exoT F     | CCGAGATCAAGCAGATGATG    |
| exoT R     | GTGATCCTTCGCCAGTCTCT    |
| exoU F     | TTGCCGAGAACATTGTAAG     |
| exoU R     | TTCAGCGCTTGATTGATTTC    |
| exoY F     | AATCGTCACTACGCTGATCG    |
| exoY R     | CTGGTCGACACAGATGAACC    |
| bfmR F     | GCGAGCTGGTAGGCAACTA     |
| bfmR R     | GATGTCGAGGACGATCAGG     |
| bfmS F     | GACTACCTCAAGGAGCGCAT    |
| bfmS R     | CTCTTCGAGATCGTTCCACA    |
| Hu TNF F   | TTTGATCCCTGACATCTGGA    |
| Hu TNF R   | GGCCTAAGGTCCACTTGGT     |
| Hu IL1b F  | TCAGCCAATCTTCATTGCTC    |
| Hu IL1b R  | TCAGCCAATCTTCATTGCTC    |
| Hu IL6 F   | GCTGCAGGACATGACAACCTC   |
| Hu IL6 R   | CTGCGCAGAATGAGATGAGT    |
| Hu-Gapdh F | TGGTATCGTGGAAGGACTCA    |
| Hu-Gapdh R | CCAGTAGAGGCAGGGATGAT    |
| KP CR1 F   | ACAGGATAGAGCCAAATCCG    |
| KP CR1 R   | ATCCTTCGCTATGTCTTCCC    |
| KP CR2 F   | CAGGCGTTATTGTCATCCAC    |
| KP CR2 R   | TTCGCAAGCACTACGTCTTC    |
| KP 16S F   | GTCGTAGTCCGGATTGGAGT    |
| KP 16S R   | GTATTCACCGTGGCATTCTG    |
| EC CR1 F   | CTGGCTGGCAATCTCTTTC     |
| EC CR1 R   | AAATCCGGAGATACGGAAACT   |
| EC CR2 F   | CCGTGTATCTGCTCGGTTTA    |
| EC CR2 R   | TTAACGCTCACCAGCATTTC    |
| EC 16S F   | GTAGCGGTGAAATGCGTAGA    |
| EC 16S R   | CAAATCGACATCGTTTACGG    |

---

*Primers for plasmid construction*

Cas3 F CGGAATTCATGAACATCCTGCTGGTGTCTG (*EcoR* I)

|              |                                                                         |
|--------------|-------------------------------------------------------------------------|
| Cas3 C His R | CCCAAGCTTTCAATGATGATGATGATGATGGTTGTATTCTTGAAC<br>CCC ( <i>Hind</i> III) |
| D124A F      | CTGTTCCACGGAATCGGCAAGGCCAGCCAG                                          |
| D124A R      | CTGGCTGGCCTTGCCGATTCCGTGGAACAG                                          |
| K427A F      | TCGACCGGTTGCGGTGGAACCCTCGCCAAC                                          |
| K427A R      | GTTGGCGAGGGTTCACCGCAACCGGTCTGA                                          |
| D576A F      | TCCGACCTGGTGTCTCGGAGAGGTCTGACGAC                                        |
| D576A R      | GTCGTCTGACCTCTCCGAGCACCAGGTCTGGA                                        |
| P611A F      | GCGACCCTGGGACCGGCCTTGGTG                                                |
| P611A R      | CACCAAGGCCGGTCCCAGGGTCTGC                                               |
| E825A F      | TCGCCGGTGGCGGGAGTCCGGTCTGC                                              |
| E825A R      | GCGACCGACTCCCGCCACCGGCGA                                                |
| R852A F      | CAGTTGGCCGGGGGAATCCGCCGC                                                |
| R852A R      | GCGGCGGATTCCCCCGCCAACCTG                                                |
| plasR F      | CCAAGCTTATGGCCTTGGTTGACGGTTTTC ( <i>Hind</i> III)                       |
| plasR R      | CGGGATCCTCAGAGAGTAATAAGACCC ( <i>Bam</i> H I)                           |
| pTCR1        | CCAAGCTTTCAGAACCAGGGAACGAAACC ( <i>Hind</i> III)                        |
| pTCR2        | AACAGCGGTGCTAGCAGGTGGTAG                                                |
| pTCR3        | CTACCACCTGCTAGCACCGCTGTT                                                |
| pTCR4        | CTGTGGTCTCGCGCCGCGGATCCAG                                               |
| pTCR5        | CTGGATCCGCGGCCGCGACCACAG                                                |
| pTCR6        | CGGAATTCCTTACGAGACCTCGAAAAAAGAGGG ( <i>Eco</i> R I)                     |
| pKO-lasR1    | CGAGCTCCCCGAACGGAAAAGT ( <i>Sac</i> I)                                  |
| pKO-lasR2    | GAAGAACGTAGCGCTTCTTGCCTCTCAGGT                                          |
| pKO-lasR3    | ACCTGAGAGGCAAGAAGCGCTACGTTCTTC                                          |
| pKO-lasR4    | GCTCTAGATAACCATCGATTTCCATC ( <i>Xba</i> I)                              |
| pCR1-F       | CGGAATTCGGGAUGGACGCUAUGCUUGG ( <i>Eco</i> R I)                          |
| pCR1-R       | CAAGCTTAAAGGGACTTCGTTTCGACT ( <i>Hind</i> III)                          |
| perRNA1-12 F | CGGAATTCGTTTGCAGGAAGCGGCGCTATCGCACCGAACTTAAA<br>AGATCTTTGACAGCTAGC      |
| perRNA1-12 R | CAAGCTTCACAAAAAAGCACCGACTCGGTG ( <i>Hind</i> III)                       |
| EGFP F       | CGGAATTCATGGTTTCGAAGGGCGAG ( <i>Eco</i> R I)                            |
| EGFP R       | CCCAAGCTTTTACTTGTACAGCTCGTC ( <i>Hind</i> III)                          |

---

*lasR* mRNA substrate

|                   |                                            |
|-------------------|--------------------------------------------|
| lasR 428-467      | CGUUUCAUGGAGUCGGUCCAGCCGACCCUGUGGAUGCUC    |
| lasR 330-369      | GUGUAUGGGCUGACCAUGCCGUGCAUGGUGCGCGGGC      |
| lasR 136-175      | GGACUACGAGAACGCCUUCUUCGUCGGCAACUACCCGGCC   |
| lasR 381-420      | CUGAGCCUCAGCGUGGAAGCGGAGAACCAGGGCCGAGGCCA  |
| lasR 435-474      | CAUGGAGUCGGUCCAGCCGACCCUGUGGAUGCUCUAAAGGAC |
| lasR 648-687 (WT) | UCGGCGGAAGUUCGGUGCGAUAGCGCCGCUUCCUGCAAAC   |
| 100% mu           | UCGGCGGAAGUUCGGUGCGAUAGCGCCGCUUCCUGCAAAC   |
| PAM mu1           | UCGGCUUCAGUUCGGUGCGAUAGCGCCGCUUCCUGCAAAC   |
| PAM mu2           | UCGGCGUAAGUUCGGUGUGACCUCGCGCCGCUUAGCGGCC   |
| PAM mu3           | UCGGCUGAAGUUCGGUGUGACCUCGCGCCGCUUAGCGGCC   |

|             |                                                                  |
|-------------|------------------------------------------------------------------|
| PAM mu4     | UCGGCUUAAGUUCGGUGUGACCUCGCGCGUAGCGGCC                            |
| PAM mu5     | UCGGC <sup>GG</sup> UAGUUCGGUGUGACCUCGCGCGUAGCGGCC               |
| PAM mu6     | UCGGC <sup>GG</sup> GAGUUCGGUGUGACCUCGCGCGUAGCGGCC               |
| PAM mu7     | UCGGC <sup>GG</sup> CAGUUCGGUGUGACCUCGCGCGUAGCGGCC               |
| Length mu1  | UCGGCGGAAGUUCGGUGCGAACCUCCCGCGCGUAGCGGCC                         |
| Length mu2  | UCGGCGGAAGUUCGGUGUGCCUCCCGCGCGUAGCGGCC                           |
| Length mu3  | UCGGCGGAAGUUCGGUGUCCUCCCGCGCGUAGCGGCC                            |
| Length mu4  | UCGGCGGAAGUUCGGUUUCCUCCCGCGCGUAGCGGCC                            |
| Length mu5  | UCGGCGGAAGUUCGGUUUCCUCCCGCGCGUAGCGGCC                            |
| Length mu6  | UCGGCGGAAGUUCGUGUUUCCUCCCGCGCGUAGCGGCC                           |
| Length mu7  | UCGGCGGAAGUUCUUGUUUCCUCCCGCGCGUAGCGGCC                           |
| Length mu8  | UCGGCGGAAGUUAUUGUUUCCUCCCGCGCGUAGCGGCC                           |
| Length mu9  | UCGGCGGAAGUGAUUGUUUCCUCCCGCGCGUAGCGGCC                           |
| Length mu10 | UCGGCGGAAGGGAUUGUUUCCUCCCGCGCGUAGCGGCC                           |
| Length mu11 | UCGGCGGAAGUGAUUGUUUCCUCCCGCGCGUAGCGGCC                           |
| Length mu13 | UCGGCGGACUGGAUUGUUUCCUCCCGCGCGUAGCGGCC                           |
| Mis mu1     | UCGGCGGACGUUCGGUGUGAACCUCCCGCGCGUAGCGGCC                         |
| Mis mu2     | UCGGCGGAUUUCGGUGUGAACCUCCCGCGCGUAGCGGCC                          |
| Mis mu3     | UCGGCGGAAGUCGGUGUGAACCUCCCGCGCGUAGCGGCC                          |
| Mis mu4     | UCGGCGGAAGUGCGGUGUGAACCUCCCGCGCGUAGCGGCC                         |
| Mis mu5     | UCGGCGGAAGUUAGGUGUGAACCUCCCGCGCGUAGCGGCC                         |
| Mis mu6     | UCGGCGGAAGUUCUGUGUGAACCUCCCGCGCGUAGCGGCC                         |
| Mis mu7     | UCGGCGGAAGUUCGUUGUGAACCUCCCGCGCGUAGCGGCC                         |
| Mis mu8     | UCGGCGGAAGUUCGGGGUGAACCUCCCGCGCGUAGCGGCC                         |
| Mis mu9     | UCGGCGGAAGUUCGGUUUGAACCUCCCGCGCGUAGCGGCC                         |
| Mis mu10    | UCGGCGGAAGUUCGGUGUUAACCUCCCGCGCGUAGCGGCC                         |
| Mis mu11    | UCGGCGGAAGUUCGGUGUGCCUCCCGCGCGUAGCGGCC                           |
| crRNAs      |                                                                  |
| 1-10        | GUUCACUGCCGUAUAGGCAGCUAAGAAAAGAACAUGGCCCGG<br>CUCGCGACGUUGCUGCGG |
| 1-12        | GUUCACUGCCGUAUAGGCAGCUAAGAAAGUUUGCAGGAAGCG<br>GCGCUAUCGCACCGAACU |
| 2-5         | UUUCUUAGCUGCCUACACGGCAGUGAACAACCGCGCGCAACA<br>GCUGUGCAUCGUCACCUU |
| 2-6         | UUUCUUAGCUGCCUACACGGCAGUGAACCGUCUCGAUGCUGC<br>CGUCGAUGAGCGUCUUGU |
| 2-18        | UUUCUUAGCUGCCUACACGGCAGUGAACGACCAGAUCUGCC<br>GCAGUACUGGCAGGACCG  |
| 2-19        | UUUCUUAGCUGCCUACACGGCAGUGAACGUCGAGCCACUGU<br>GUCGGCCAAAACCAGGUC  |

---

## References

- 2 Cady KC, O'Toole GA. Non-identity-mediated CRISPR-bacteriophage interaction mediated via the Csy and Cas3 proteins. *Journal of bacteriology* 2011; **193**:3433-3445.
- 3 Limmer S, Haller S, Drenkard E *et al.* Pseudomonas aeruginosa RhIR is required to neutralize the cellular immune response in a Drosophila melanogaster oral infection model. *Proceedings of the National Academy of Sciences of the United States of America* 2011; **108**:17378-17383.
- 4 Lin MH, Hsu TL, Lin SY *et al.* Phosphoproteomics of Klebsiella pneumoniae NTUH-K2044 reveals a tight link between tyrosine phosphorylation and virulence. *Molecular & cellular proteomics : MCP* 2009; **8**:2613-2623.
- 5 Bondy-Denomy J, Garcia B, Strum S *et al.* Multiple mechanisms for CRISPR-Cas inhibition by anti-CRISPR proteins. *Nature* 2015; **526**:136-139.
- 6 Zegans ME, Wagner JC, Cady KC, Murphy DM, Hammond JH, O'Toole GA. Interaction between bacteriophage DMS3 and host CRISPR region inhibits group behaviors of Pseudomonas aeruginosa. *Journal of bacteriology* 2009; **191**:210-219.
